# Supplementary material for: Comparison of Quality Changes in Eurasian Perch (Perca fluviatilis L.) Fillets Originated from Two Different Rearing Systems during Frozen and Refrigerated Storage
Source: MDPI journal article supplement (doi:10.3390/foods10061405), 2021-06-17
Supplement: s1 [file s1]

**Table S1.** Protein identification by PMF (Peptide mass fingerprinting) and MALDI TOF/TOF.

| Protein Spot. | Protein Identified        | Accession Number | Function                                                                         | Mascot Score | Expectation          | Peptides in Match | Mass (kDa) | Isoelectric Point |
|---------------|---------------------------|------------------|----------------------------------------------------------------------------------|--------------|----------------------|-------------------|------------|-------------------|
| 1             | Actin                     | P68140           | Skeletal muscle protein                                                          | 127          | $1.1 \times 10^{-9}$ | 11                | 43         | 5.22              |
| 2             | GAPDH                     | Q5XJ10           | Carbohydrate degradation; glycolysis                                             | 68           | 0.00095              | 8                 | 37         | 8.20              |
| 3             | LDH A-chain               | O93543           | Pyruvate fermentation to lactate                                                 | 58           | 0.009                | 7                 | 37         | 6.35              |
| 4             | Beta-enolase              | B5DGQ7           | Carbohydrate degradation; glycolysis; pyruvate from D-glyceraldehyde 3-phosphate | 63           | 0.0027               | 8                 | 49         | 6.61              |
| 5             | Triosephosphate isomerase | Q90XG0           | Glycolysis<br>Gluconeogenesis                                                    | 79           | $7.2 \times 10^{-5}$ | 8                 | 28         | 6.45              |

According to the protein function from Peptide Mass Fingerprinting online Mascot server, the identified proteins were actin, GAPDH, LDH A-chain, Beta-enolase, Triose phosphate isomerase and Beta-enolase. GAPDH, Glyceraldehyde 3-phosphate dehydrogenase. LDH A-chain, Lactate dehydrogenase A-chain.
